# Supplementary material for: Morphology and wettability control of honeycomb porous films of amphiphilic fluorinated pentablock copolymers via breath figure method
Source: Royal Society of Chemistry journal article supplement (doi:10.1039/c4ra08472a), 2014-09-19
Supplement: c4ra08472a1.pdf [file c4ra08472a1.pdf]

## Morphology and wettability control of honeycomb porous films of amphiphilic fluorinated pentablock copolymers via breath figure method

Zhiguang Li,<sup>a,b</sup> Xiaoyan Ma,<sup>\*a,b</sup> Duyang Zang,<sup>\*a</sup> Beirong Shang,<sup>a,b</sup> Xiu Qiang,<sup>a,b</sup> Qing Hong,<sup>a,b</sup> and Xinghua Guan<sup>a,b</sup>

<sup>a</sup> Key Laboratory of Space Applied Physics and Chemistry, Ministry of Education, Shaanxi province, School of Science, Northwestern Polytechnical University, Xi'an 710129, China. Tel: +86-29-88431676 E-mail: [m\\_xiao\\_yana@nwpu.edu.cn](mailto:m_xiao_yana@nwpu.edu.cn) ;

<sup>b</sup> Key Laboratory of Polymer Science and Technology, Shaanxi province, School of Science, Northwestern Polytechnical University, Xi'an, 710129, China. Tel: +86-29-88431618 E-mail: [dyzang@nwpu.edu.cn](mailto:dyzang@nwpu.edu.cn)

### Materials

Poly (ethylene glycol) (PEG<sub>2000</sub>) and Trifluoroethyl methacrylate (TFEMA) were purchased from Aldrich, Methyl methacrylate (MMA), Triethylamine (TEA) and CuCl were purified according to the method reported in preceding studies.<sup>1</sup> The chemical reagents, 2-bromopropionyl bromide(2-BPB), N, N, N', N', N"-pentamethyldiethylenetriamine (PMDETA), 4-dimethylamiopyridine (DMAP), were used as received without purification. Solvents were dried by standard process.

### Polymerization Process

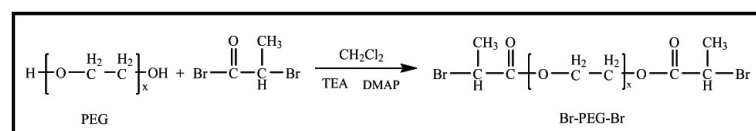

Figure S1. The process for synthesis of Br-PEG-Br.

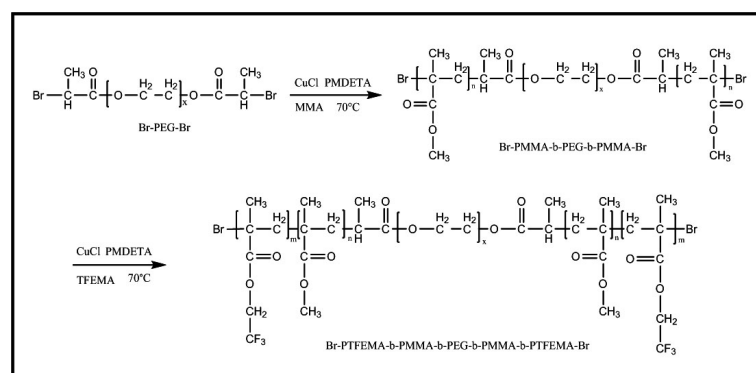

Figure S2. The process for synthesis of PTFEMA-b-PMMA-b-PEG-b-PMMA-b-PTFEMA pentablock copolymer.

## Results

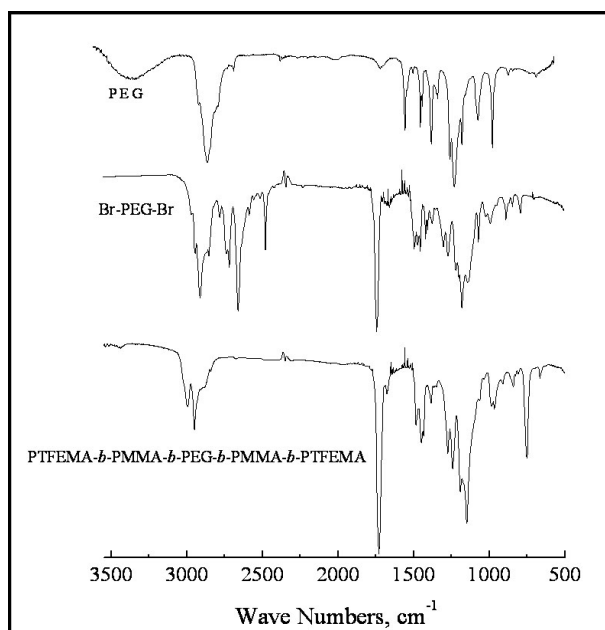

Figure S3. The FTIR spectra of the PEG, Br-PEG-Br and the pentablock copolymer.

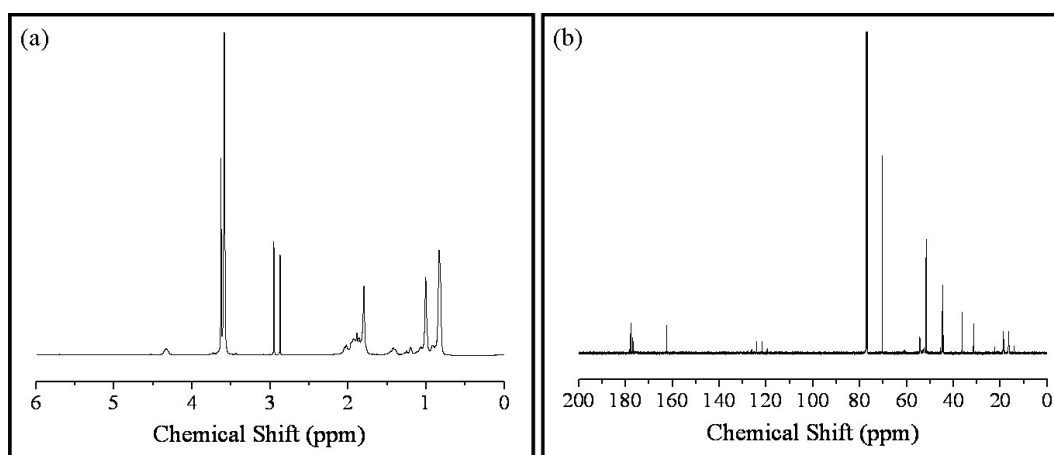

Figure S4. Spectra of the pentablock copolymers measured in CHCl<sub>3</sub>. (a) <sup>1</sup>H NMR, (b) <sup>13</sup>C NMR

## Reference

1. Chen, W.-H.; Liaw, D.-J.; Wang, K.-L.; Lee, K.-R.; Lai, J.-Y. *Polymer* 2009, 50, (22), 5211-5219.
